# Supplementary material for: Poisoning by Baccharis coridifolia in Early-Weaned Beef Calves: Pathological Study and New Macrocyclic Trichothecene Identification
Source: MDPI journal article supplement (doi:10.3390/toxins15120681), 2023-12-01
Supplement: s1 [file s1]

**Table S1.** – Detected analytes and their concentration in ‘roridin A equivalents’. All compounds contained fragment ions at  $m/z$  231.1366 and 249.1470 that are common to all major trichothecenes. (SD = standard deviation).

| <i>Apo</i>               |                                                                       |            |                 |             |               |
|--------------------------|-----------------------------------------------------------------------|------------|-----------------|-------------|---------------|
| #                        | <i>Putative compounds</i>                                             | <i>m/z</i> | <i>RT (min)</i> | <i>ug/g</i> | <i>SD +/-</i> |
| 1                        | verrucarin J                                                          | 502.2435   | 4               | 40          | 4             |
| 2                        | verrucarin A                                                          | 520.2541   | 3.37            | 0.26        | 0.09          |
| 3                        | iso-verrucarin A                                                      | 520.25411  | 3.55            | 0.23        | 0.2           |
| 4                        | roridin H; verrucarin H                                               | 530.2748   | 4.05            | <LOD        | -             |
| 5                        | roridin H; verrucarin H                                               | 530.2748   | 3.8             | <LOD        | -             |
| 6                        | miophytocen A; miophytocen B; roridin E                               | 532.2905   | 3.91            | 230         | 25            |
| 7                        | miophytocen A; miophytocen B; roridin E                               | 532.2905   | 3.74            | 1.9         | 0.2           |
| 8                        | miotoxin A; miotoxin B; roridin D                                     | 548.2854   | 3.46            | 20          | 2             |
| 9                        | miotoxin A; miotoxin B; roridin D                                     | 548.2854   | 3.64            | 11          | 1             |
| 10                       | miotoxin A; miotoxin B; roridin D                                     | 548.2854   | 3.7             | 19          | 2             |
| 11                       | miotoxin D; miotoxin iso-D                                            | 550.3012   | 3.07            | 0.85        | 0.1           |
| 12                       | roridin A                                                             | 550.3011   | 3.51            | 59          | 6             |
| 13                       | baccharinoid B27                                                      | 562.2647   | 3.72            | <LOD        | -             |
| 14                       | miotoxin E; baccharinoid B27, B10, B12, B17, B21, B9, B13, B14, B16   | 564.2803   | 3.38            | 16          | 1             |
| 15                       | miotoxin F; baccharinoid B1, B2, B3, B7, B20, B23, B24                | 566.2959   | 3.27            | 5.1         | 0.4           |
| 16                       | baccharin; baccharinoid B5, baccharinol, isobaccharinol, isobaccharin | 580.2752   | 3.07            | <LOD        | -             |
| 17                       | miotoxin C; baccharinoid A1, B4                                       | 608.3065   | 3.57            | 91          | 3             |
| 18                       | miotoxin C; baccharinoid A1, B4                                       | 608.3065   | 3.43            | 1.0         | 0.3           |
| <i>glucosides</i>        |                                                                       |            |                 |             |               |
|                          | <i>Putative compounds</i>                                             | <i>m/z</i> | <i>RT (min)</i> | <i>ug/g</i> | <i>+/-</i>    |
| 19                       | miophytocen A; miophytocen B; roridin E                               | 694.3433   | 3.2             | 2.4         | 0.4           |
| 20                       | miophytocen A; miophytocen B; roridin E                               | 694.3433   | 3.29            | 82          | 9             |
| 21                       | miophytocen A; miophytocen B; roridin E                               | 694.3433   | 3.75            | <LOD        | -             |
| 22                       | miotoxin A; miotoxin B; roridin D                                     | 710.3382   | 3.08            | 14          | 3             |
| 23                       | miotoxin A; miotoxin B; roridin D                                     | 710.3382   | 3.15            | 45          | 5             |
| 24                       | roridin A                                                             | 712.3539   | 3.05            | 72          | 10            |
| 25                       | miotoxin D; miotoxin iso-D                                            | 712.3539   | 2.74            | 0.62        | 0.2           |
| 26                       | miotoxin E; baccharinoid B27, B10, B12, B17, B21, B9, B13, B14, B16   | 726.3331   | 3.01            | 16          | 1             |
| 27                       | miotoxin F; baccharinoid B1, B2, B3, B7, B20, B23, B24                | 728.3488   | 2.97            | 7.7         | 1             |
| <i>malonyl glucoside</i> |                                                                       |            |                 |             |               |
|                          | <i>Putative compounds</i>                                             | <i>m/z</i> | <i>RT (min)</i> | <i>ug/g</i> | <i>+/-</i>    |
| 28                       | verrucarin A                                                          | 768.3073   | 3.13            | 1.2         | 0.5           |
| 29                       | roridin H; verrucarin H                                               | 778.3281   | 3.25            | <LOD        | -             |
| 30                       | miophytocen A; miophytocen B; roridin E                               | 780.3437   | 3.27            | 3.7         | 0.6           |
| 31                       | miophytocen A; miophytocen B; roridin E                               | 780.3437   | 3.36            | 139         | 18            |
| 32                       | miotoxin A; miotoxin B; roridin D                                     | 796.3386   | 3.14            | 2.1         | 0.4           |
| 33                       | miotoxin A; miotoxin B; roridin D                                     | 796.3386   | 2.93            | <LOD        | -             |
| 34                       | miotoxin A; miotoxin B; roridin D                                     | 796.3386   | 3.23            | 11          | 2             |
| 35                       | roridin A                                                             | 798.3543   | 3.11            | 19          | 3             |

|                          |                                                                     |            |                 |             |            |
|--------------------------|---------------------------------------------------------------------|------------|-----------------|-------------|------------|
| 36                       | miotoxin D; miotoxin iso-D                                          | 798.3543   | 2.81            | <LOD        | -          |
| 37                       | miotoxin E; baccharinoid B27, B10, B12, B17, B21, B9, B13, B14, B16 | 812.3335   | 3.07            | <LOD        | -          |
| 38                       | miotoxin F; baccharinoid B1, B2, B3, B7, B20, B23, B24              | 814.3492   | 3.02            | <LOD        | -          |
| <b>Unknowns</b>          |                                                                     |            |                 |             |            |
| <b>apo</b>               |                                                                     |            |                 |             |            |
|                          | <i>Putative compounds</i>                                           | <i>m/z</i> | <i>RT (min)</i> | <i>ug/g</i> | <i>+/-</i> |
| 39                       | Unk-C26H34O7                                                        | 476.2643   | 4.37            | 0.46        | 0.2        |
| 40                       | Unk-C31H38O10-I                                                     | 588.2803   | 3.93            | 6.7         | 0.4        |
| 41                       | Unk-C31H38O10-II                                                    | 588.2803   | 4.01            | 1.6         | 0.2        |
| 42                       | Unk-C31H40O10-I                                                     | 590.2960   | 3.8             | 14          | 0.4        |
| 43                       | Unk-C31H40O10-II                                                    | 590.2960   | 3.98            | 20          | 13         |
| 44                       | Unk-C31H40O10-III                                                   | 590.2960   | 4.03            | 26          | 9          |
| 45                       | Unk-C31H40O10-IV                                                    | 590.2960   | 4.21            | 2.7         | 0.2        |
| 46                       | Unk-C31H40O11-I                                                     | 606.2909   | 3.64            | 2.2         | 0.2        |
| 47                       | Unk-C31H40O11-II                                                    | 606.2909   | 3.73            | 38          | 0.4        |
| 48                       | Unk-C31H40O9-I                                                      | 574.3011   | 4.17            | 1.8         | 0.1        |
| 49                       | Unk-C31H40O9-II                                                     | 574.3011   | 4.26            | 6.6         | 0.5        |
| 50                       | Unk-C31H42O10                                                       | 592.3116   | 3.87            | 149         | 7          |
| 51                       | Unk-C33H44O11                                                       | 634.3222   | 4.17            | 8.2         | 0.3        |
| <b>glucoside</b>         |                                                                     |            |                 |             |            |
|                          | <i>Putative compounds</i>                                           | <i>m/z</i> | <i>RT (min)</i> | <i>ug/g</i> | <i>+/-</i> |
| 52                       | Unk-C31H40O10-I                                                     | 752.3488   | 3.25            | <LOD        | -          |
| 53                       | Unk-C31H40O10-II                                                    | 752.3488   | 3.35            | <LOD        | -          |
| 54                       | Unk-C31H40O9-I/II                                                   | 736.3539   | 3.53            | 5.6         | 0.8        |
| 55                       | Unk-C31H42O10                                                       | 754.3646   | 3.25            | 4.5         | 0.5        |
| <b>malonyl glucoside</b> |                                                                     |            |                 |             |            |
|                          | <i>Putative compounds</i>                                           | <i>m/z</i> | <i>RT (min)</i> | <i>ug/g</i> | <i>+/-</i> |
| 56                       | Unk-C31H42O10                                                       | 840.3648   | 3.32            | 0.72        | 0.1        |
| <b>Total (mg/g)</b>      |                                                                     |            |                 | 1197        | 136        |
